# Supplementary material for: Controlling the carrier density in niobium oxynitride BaNbO2N via cation doping for efficient photoelectrochemical water splitting under visible light
Source: Royal Society of Chemistry journal article supplement (doi:10.1039/d1se01272j), 2021-01-01
Supplement: d1se01272j1.pdf [file d1se01272j1.pdf]

## Supporting Information

### Controlling the carrier density in niobium oxynitride $\text{BaNbO}_2\text{N}$ via cation doping for efficient photoelectrochemical water splitting under visible light

Takafumi Iwai,<sup>a</sup> Akinobu Nakada,<sup>a</sup> Masanobu Higashi,<sup>a</sup> Hajime Suzuki,<sup>a</sup> Osamu Tomita,<sup>a</sup> Ryu Abe<sup>a,b\*</sup>

<sup>a</sup> Department of Energy and Hydrocarbon Chemistry, Graduate School of Engineering, Kyoto University, Nishikyo-ku, Kyoto 615-8510, Japan.

<sup>b</sup> CREST, Japan Science and Technology Agency (JST), Kawaguchi, Saitama, 332-0012, Japan.

\*Corresponding author. E-mail: ryu-abe@scl.kyoto-u.ac.jp

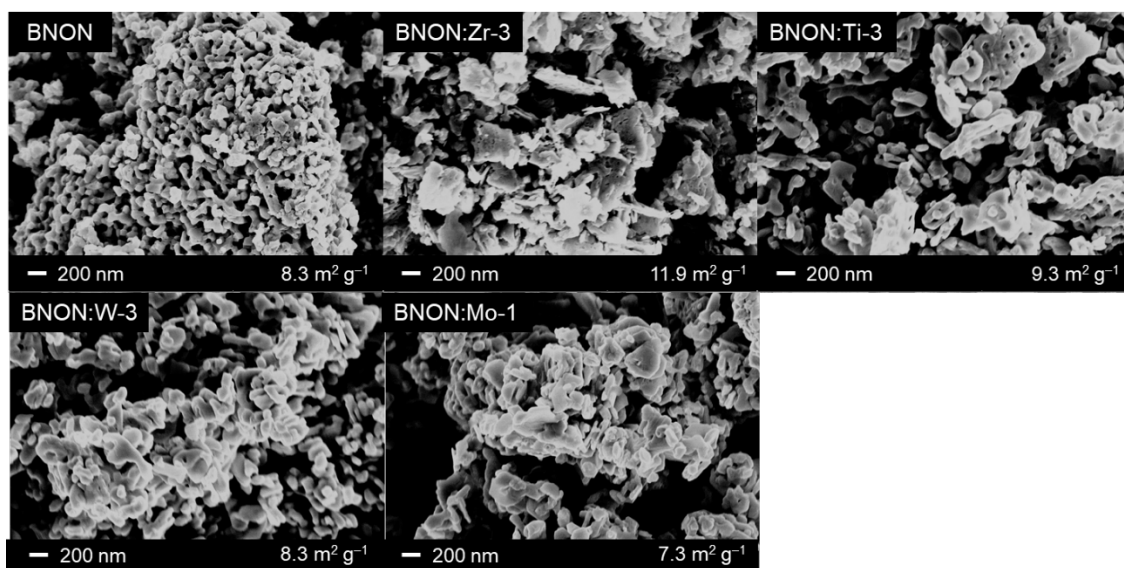

Fig. S1 SEM images of BNON, BNON:Zr-3, BNON:Ti-3, BNON:W-3, and BNON:Mo-1 samples.

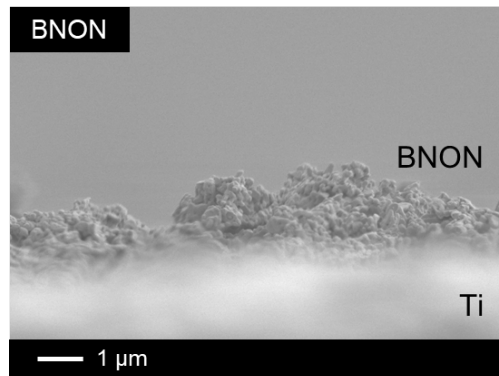

**Fig. S2** Cross-sectional SEM image of BNON electrode.

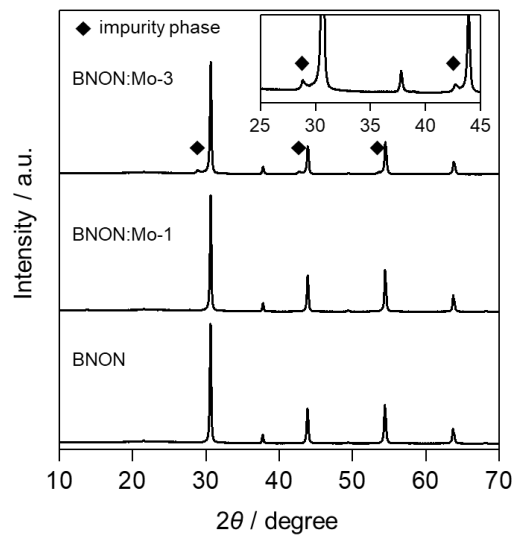

**Fig. S3** XRD patterns of BNON, and BNON:Mo- $x$  ( $x = 1, 3$ ) samples. The inset shows the enlarged pattern around impurity phases.

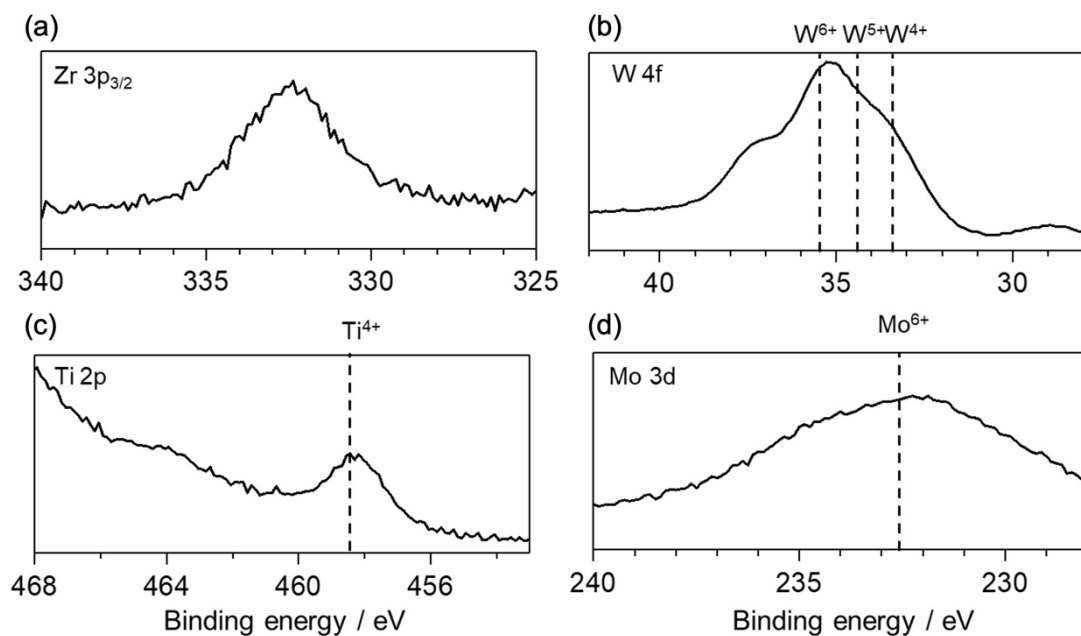

**Fig. S4** XPS spectra in (a) Zr 3p, (b) W 4f, (c) Ti 2p, and (d) Mo 3d regions of BNON:Zr-3, BNON:W-3, BNON:Ti-3, and BNON:Mo-1 samples.

**Table S1** The atomic ratio of the dopant to Nb in BNON samples evaluated by XPS.

| Sample    | Measured dopant/(Nb+dopant) ratio | Ideal dopant/(Nb+dopant) ratio |
|-----------|-----------------------------------|--------------------------------|
| BNON:Mo-1 | 0.01                              | 0.01                           |
| BNON:W-3  | 0.08                              | 0.03                           |
| BNON:Zr-3 | — <sup>a</sup>                    | 0.03                           |
| BNON:Ti-2 | 0.02                              | 0.02                           |
| BNON:Ti-3 | 0.03                              | 0.03                           |
| BNON:Ti-4 | 0.04                              | 0.04                           |

<sup>a</sup> Unmeasurable due to the overlap of the peaks corresponding to Zr 3d and Ba 4p.

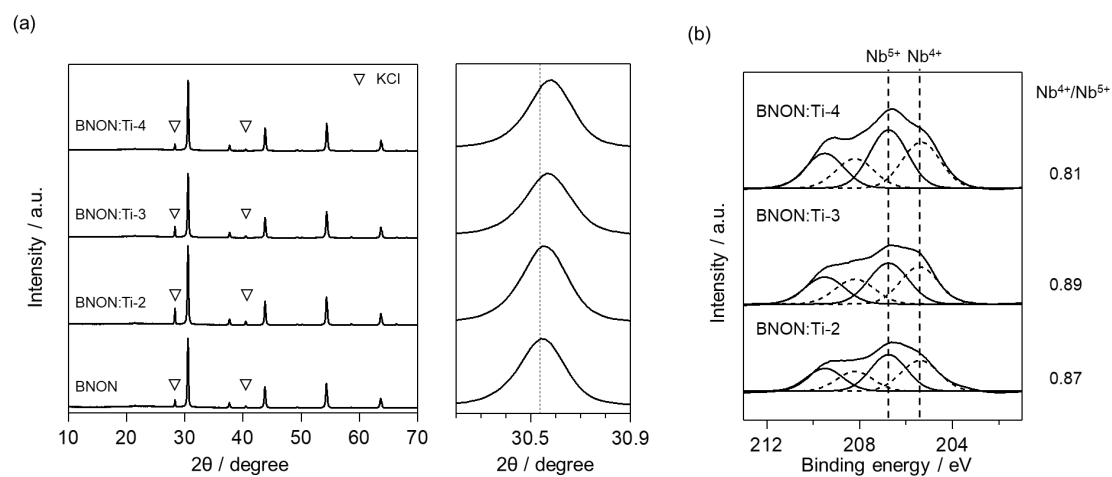

**Fig. S5** (a) XRD patterns of BNON, and BNON:Ti- $x$  ( $x = 2, 3, 4$ ) samples. KCl (10 wt%) was added as an internal standard sample for the correction of  $2\theta$  angles. (b) XP spectra of Nb 3d region for BNON:Ti- $x$  ( $x = 2, 3, 4$ ) samples.

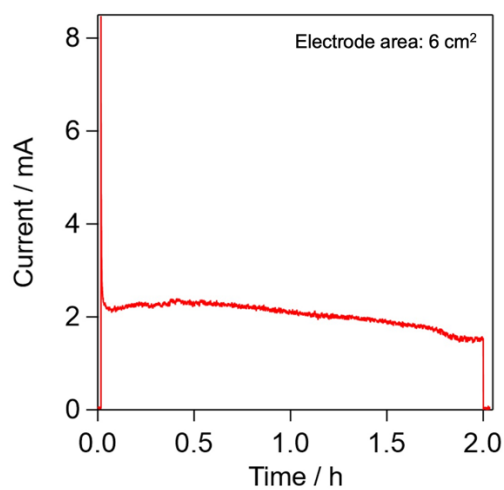

**Fig. S6** Time course of photocurrent at +1.02 V (vs. RHE) in an aqueous  $\text{Na}_2\text{SO}_4$  solution (0.1 M, pH 6) containing  $\text{H}_2\text{O}_2$  (0.1 M) for unmodified BNON:Ti-4 electrode under visible light ( $400 < \lambda < 800$  nm).

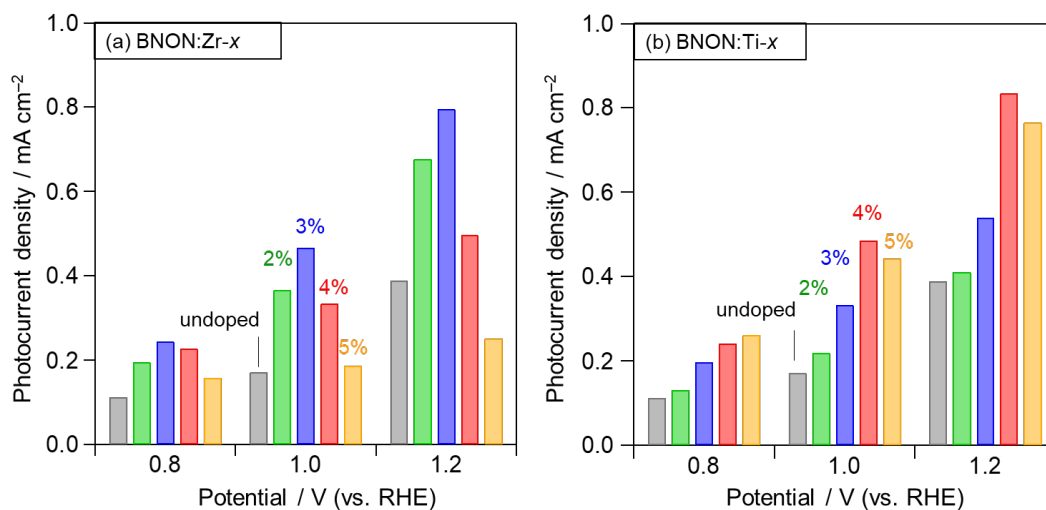

**Fig. S7** Dependence of photocurrent density of (a) BNON:Zr-*x* and (b) BNON:Ti-*x* electrodes in an aqueous Na<sub>2</sub>SO<sub>4</sub> solution (0.1 M, pH 6) under visible light on the amount of dopant.

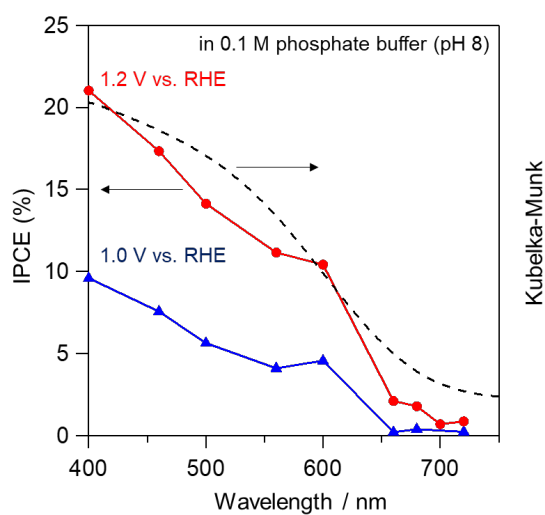

**Fig. S8** IPCE spectra of CoO<sub>y</sub>/BNON:Ti-4 electrode (phosphate buffer solution, pH 8), and absorption spectrum of BNON:Ti-4.
